# Supplementary material for: Spatiotemporal contact between peroxisomes and lipid droplets regulates fasting-induced lipolysis via PEX5
Source: PubMed Central journal article supplement (PMC6989686; doi:10.1038/s41467-019-14176-0), 2020-01-29
Supplement: 41467_2019_14176_MOESM3_ESM.pdf [file 41467_2019_14176_MOESM3_ESM.pdf]

## Description of Additional Supplementary Files

File Name: Supplementary Movie 1

Description: **Peroxisomes move toward LDs upon treatment with FSK.** Merged images for live cell microscopy of peroxisome movement toward LD after FSK treatment (2 h), related to Supplementary Fig. 1f. Differentiated 3T3-L1 adipocytes were expressed with mCHERRY::PTS1 (peroxisome marker, red) and stained with BODIPY (LD marker, green). FSK, forskolin. Scale bars, 40  $\mu\text{m}$ .

File Name: Supplementary Movie 2

Description: **Peroxisomes move toward LDs upon treatment with FSK peroxisome.** Peroxisome images for live cell microscopy of peroxisome movement toward LD after FSK treatment (2 h), related to Supplementary Fig. 1f. Differentiated 3T3-L1 adipocytes were expressed with mCHERRY::PTS1 (peroxisome marker, red). FSK, forskolin. Scale bars, 40  $\mu\text{m}$ .

File Name: Supplementary Movie 3

Description: **Peroxisomes move toward LDs upon treatment with FSK LD.** LD images for live cell microscopy of peroxisome movement toward LD after FSK treatment (2 h), related to Supplementary Fig. 1f. Differentiated 3T3-L1 adipocytes were stained with BODIPY (LD marker, green). FSK, forskolin. Scale bars, 40  $\mu\text{m}$ .
